# Supplementary material
Source: Springer Nature journal article supplement (https://www.springermedizin.de/resource/supplementary/12943_2009_611_MOESM16_ESM.pdf/9555104)

**A**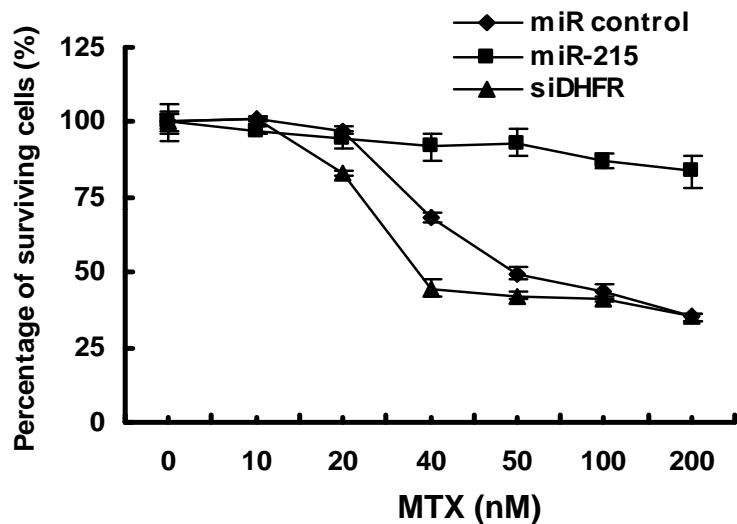**B**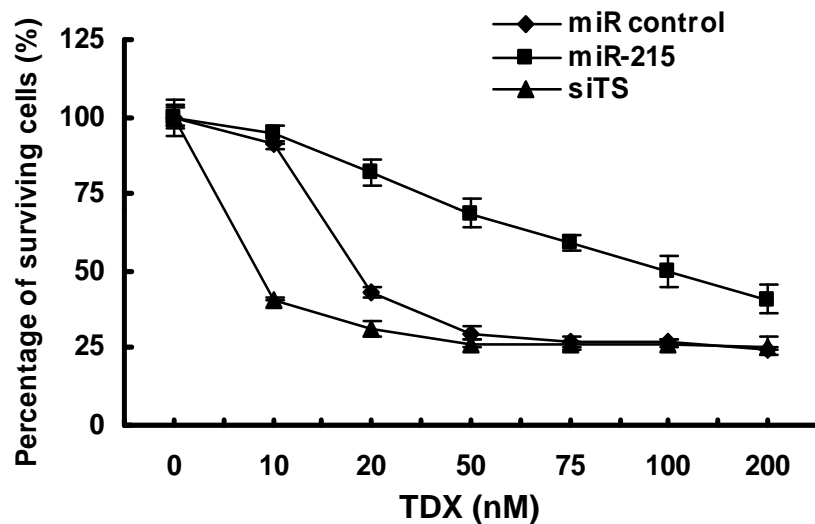**C**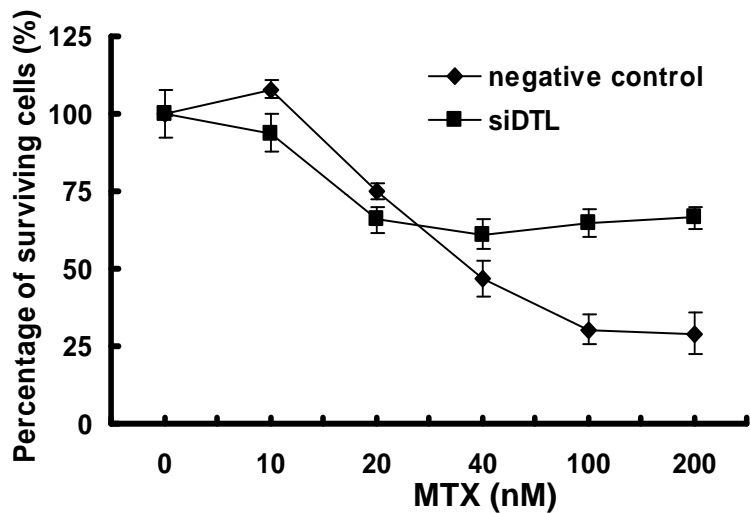**D**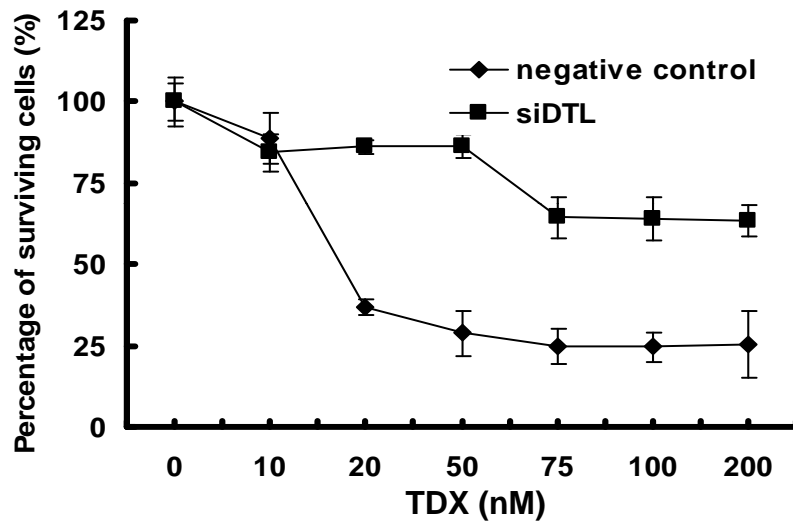

Supplement: MOESM16 [file 9555104]
